# Supplementary material for: Metronidazole treatment of acute diarrhea in dogs: A randomized double blinded placebo‐controlled clinical trial
Source: PubMed Central journal article supplement (PMC6979100; doi:10.1111/jvim.15664), 2019-11-19
Supplement: JVIM-34-98-s001.pdf [file JVIM-34-98-s001.pdf]

# Appendix 1

Drug / dose \_\_\_\_\_

|        | Medication |      |            |    |      | Adverse Events *   |    |          |    |          |    |              |    |
|--------|------------|------|------------|----|------|--------------------|----|----------|----|----------|----|--------------|----|
|        |            |      | Dose given |    | Time | worsening diarrhea |    | anorexia |    | lethargy |    | Other Effect |    |
|        | Date       | Dose | yes        | no |      | yes                | no | yes      | no | yes      | no | yes          | no |
| WEEK 1 |            | AM   |            |    |      |                    |    |          |    |          |    |              |    |
|        |            | PM   |            |    |      |                    |    |          |    |          |    |              |    |
|        |            | AM   |            |    |      |                    |    |          |    |          |    |              |    |
|        |            | PM   |            |    |      |                    |    |          |    |          |    |              |    |
|        |            | AM   |            |    |      |                    |    |          |    |          |    |              |    |
|        |            | PM   |            |    |      |                    |    |          |    |          |    |              |    |
|        |            | AM   |            |    |      |                    |    |          |    |          |    |              |    |
|        |            | PM   |            |    |      |                    |    |          |    |          |    |              |    |
|        |            | AM   |            |    |      |                    |    |          |    |          |    |              |    |
|        |            | PM   |            |    |      |                    |    |          |    |          |    |              |    |
|        |            | AM   |            |    |      |                    |    |          |    |          |    |              |    |
|        |            | PM   |            |    |      |                    |    |          |    |          |    |              |    |

\*Adverse Event - If any adverse events were noted above, please elaborate, in detail, below.

---



---



---



---



---



---



---



---



---



---
