# Supplementary material for: Metronidazole treatment of acute diarrhea in dogs: A randomized double blinded placebo‐controlled clinical trial
Source: PubMed Central journal article supplement (PMC6979100; doi:10.1111/jvim.15664), 2019-11-19
Supplement: JVIM-34-98-s003.pdf [file JVIM-34-98-s003.pdf]

# Bristol Stool Chart

|        |                                                                                     |                                                                                                                                                                                                           |
|--------|-------------------------------------------------------------------------------------|-----------------------------------------------------------------------------------------------------------------------------------------------------------------------------------------------------------|
| Type 1 |    | <ul style="list-style-type: none"><li>• Separate hard lumps, like nuts</li><li>• Often expelled as individual pellets</li><li>• Hard to pass</li><li>• No residue left on ground when picked up</li></ul> |
| Type 2 |    | <ul style="list-style-type: none"><li>• Sausage-shaped but lumpy</li><li>• Firm but not hard</li><li>• Should be pliable</li><li>• Little or no residue left on ground when picked up</li></ul>           |
| Type 3 |    | <ul style="list-style-type: none"><li>• Like a sausage but with cracks on its surface</li><li>• Moist surface</li><li>• Leaves residue but holds form when picked up</li></ul>                            |
| Type 4 |   | <ul style="list-style-type: none"><li>• Like a sausage or snake, smooth and soft</li><li>• Leaves residue and loses form when picked up</li></ul>                                                         |
| Type 5 |  | <ul style="list-style-type: none"><li>• Soft blobs or piles with clear-cut edges</li><li>• Easy to pass</li><li>• Leaves residue and loses form when picked up</li></ul>                                  |
| Type 6 |  | <ul style="list-style-type: none"><li>• Fluffy pieces with ragged edges</li><li>• A mushy stool</li><li>• No defined shape (piles or spots)</li><li>• Leaves residue when picked up</li></ul>             |
| Type 7 |  | <ul style="list-style-type: none"><li>• Watery with no solid pieces</li><li>• <b>Entirely liquid</b></li></ul>                                                                                            |
